# Supplementary material for: RGS20 Promotes Tumor Progression through Modulating PI3K/AKT Signaling Activation in Penile Cancer
Source: Hindawi journal article supplement (doi:10.1155/2022/1293622), 2022-04-19
Supplement: f1 [file 1293622.f1.pdf]

## Supplementary methods

### Generation of lentivirus particles

Lentiviruses encoding shRNAs and control scramble were purchased from Genecopoeia Inc. Lentiviral particles were produced by transient cotransfection of packaging plasmids into the Lenti-Pac 293Ta cell line. Produced lentiviruses were concentrated by using Centricon Plus-20 centrifugal filter device (Millipore). The oligo sequences for shRNAs are shown as follows:

Scramble shRNA: CCTAAGGTTAAGTCGCCCTCG

shRNA for RGS20 sh-1: CATGAACTCTGCTGTCTATAA

shRNA for RGS20 sh-2: CATCTTCTGCTGGAGTAATAC

shRNA for PI3K p85 $\alpha$ : GCGGTACAGCAAAGAATACAT

shRNA for PI3K p110 $\alpha$ : GCATTAGAATTTACAGCAAGA

### Bromodeoxyuridine (BrdU) incorporation assay

BrdU incorporation was measured by a BrdU cell proliferation assay kit (Cell Signaling, Boston, MA). Briefly, PC cells were plated ( $2 \times 10^3$  cells /well) into 96-well plate and incubated for 96 hours. After incubation, cells were labeled with 10  $\mu$ M BrdU for 2 hours, then fixed and the DNA was denatured with fixing/denaturing solution. BrdU mouse antibody was added to detect the incorporated BrdU. The absorbance (OD<sub>450</sub>) was measured using a Multiskan MK3 microplate reader (Thermo Fisher Scientific, Waltham, MA, USA).

### Wound healing assay

Wound healing assay was used to evaluate the cell migratory ability. Briefly, PC cells ( $5 \times 10^5$ ) were grown in six-well plates for 48 h until the cells grew confluent. A sterile 200  $\mu$ l pipette tip was used to make a scratch wounds in the center of the well. After indicated time, the distance between the wound sides was measured.

### **Transwell invasion assay**

Cell invasion assay were performed based on transwell chamber with 8  $\mu\text{m}$  pores (Corning). PC cells ( $5 \times 10^5$  cells/well) were seeded in transwell inserts pre-coated with 50  $\mu\text{l}$  Matrigel. The plates were incubated for 36 h at 37  $^{\circ}\text{C}$ . The invaded cells on the bottom surface of the membrane were fixed by dehydrated alcohol, and stained by 0.2% crystal violet solution (Sigma-Aldrich, USA). After wash with deionized water, Pen11 cells were photographed with Olympus BX43 microscope. The crystal violet in stained cells were eluted by 20% glacial acetic acid and measured with a Thermo MK3 microplate reader at 570 nm.

**Table S1: Differentially expressed genes in shRGS20 vs. Scr comparison in Pen11**

| AccID     | Pen11 Scr1 | Pen11 scr2 | Pen11 scr3 | Pen11 KD1 | Pen11 KD2 | Pen11 KD3 | average | log2FC | P value | log10pvalue |
|-----------|------------|------------|------------|-----------|-----------|-----------|---------|--------|---------|-------------|
| MIR3192   | 0.263      | 0.409      | 0.138      | 0.000     | 0.000     | 0.071     | 0.087   | -3.515 | 0.039   | 1.404       |
| TEX19     | 0.198      | 0.175      | 0.207      | 0.000     | 0.069     | 0.000     | 0.119   | -3.074 | 0.002   | 2.628       |
| RPL11P3   | 0.329      | 0.818      | 0.965      | 0.000     | 0.000     | 0.284     | 0.134   | -2.897 | 0.047   | 1.332       |
| RN7SKP27? | 1.251      | 0.701      | 0.483      | 0.061     | 0.275     | 0.000     | 0.138   | -2.855 | 0.045   | 1.344       |
| FLJ22447  | 0.395      | 0.292      | 0.207      | 0.061     | 0.069     | 0.000     | 0.145   | -2.782 | 0.012   | 1.913       |
| PKD2L2    | 0.395      | 0.234      | 0.276      | 0.061     | 0.000     | 0.071     | 0.146   | -2.776 | 0.008   | 2.076       |
| CYP1D1P   | 0.198      | 0.117      | 0.138      | 0.000     | 0.069     | 0.000     | 0.152   | -2.716 | 0.019   | 1.732       |
| EIF4A1P7  | 0.659      | 0.993      | 0.414      | 0.000     | 0.207     | 0.142     | 0.169   | -2.568 | 0.033   | 1.484       |
| SLC2A1-AS | 0.527      | 0.234      | 0.483      | 0.000     | 0.069     | 0.142     | 0.169   | -2.561 | 0.026   | 1.581       |
| IL7R      | 4.215      | 4.381      | 4.895      | 1.162     | 0.482     | 0.709     | 0.174   | -2.520 | 0.000   | 3.692       |
| RPL10P12  | 0.198      | 0.350      | 0.207      | 0.061     | 0.000     | 0.071     | 0.175   | -2.516 | 0.019   | 1.729       |
| RPS15AP2- | 0.198      | 0.409      | 0.552      | 0.000     | 0.138     | 0.071     | 0.180   | -2.473 | 0.045   | 1.343       |
| IGKV10R2- | 0.263      | 0.175      | 0.276      | 0.061     | 0.069     | 0.000     | 0.182   | -2.459 | 0.007   | 2.147       |
| ATF4P3    | 0.132      | 0.117      | 0.069      | 0.061     | 0.000     | 0.000     | 0.193   | -2.377 | 0.037   | 1.429       |
| RPS15AP3? | 0.263      | 0.117      | 0.276      | 0.061     | 0.000     | 0.071     | 0.201   | -2.313 | 0.035   | 1.457       |
| KLHL7-AS  | 0.922      | 0.467      | 0.896      | 0.183     | 0.069     | 0.213     | 0.203   | -2.298 | 0.017   | 1.772       |
| PTGES3P3  | 0.395      | 0.350      | 0.276      | 0.000     | 0.069     | 0.142     | 0.206   | -2.278 | 0.007   | 2.134       |
| RPS20P33  | 0.395      | 0.409      | 0.483      | 0.061     | 0.138     | 0.071     | 0.210   | -2.254 | 0.001   | 3.137       |
| PITRM1-AS | 0.527      | 1.051      | 0.620      | 0.183     | 0.069     | 0.213     | 0.211   | -2.242 | 0.026   | 1.585       |
| SOS2      | 39.977     | 40.071     | 37.919     | 9.249     | 7.722     | 8.349     | 0.215   | -2.220 | 0.000   | 5.506       |
| KCNE3     | 0.856      | 0.526      | 1.241      | 0.245     | 0.275     | 0.071     | 0.225   | -2.150 | 0.035   | 1.455       |
| ATP6VOD2  | 0.329      | 0.876      | 0.758      | 0.245     | 0.069     | 0.142     | 0.232   | -2.109 | 0.044   | 1.352       |
| TM4SF1-AS | 0.856      | 0.701      | 0.689      | 0.122     | 0.344     | 0.071     | 0.239   | -2.064 | 0.005   | 2.335       |
| SNORA11F  | 0.988      | 0.467      | 0.758      | 0.183     | 0.275     | 0.071     | 0.239   | -2.063 | 0.026   | 1.592       |
| RASGRF2   | 0.263      | 0.350      | 0.414      | 0.183     | 0.069     | 0.000     | 0.245   | -2.026 | 0.020   | 1.699       |
| SNORA12   | 1.185      | 0.701      | 0.965      | 0.000     | 0.207     | 0.496     | 0.246   | -2.021 | 0.023   | 1.630       |
| SNORA12   | 1.185      | 0.701      | 0.965      | 0.000     | 0.207     | 0.496     | 0.246   | -2.021 | 0.023   | 1.630       |
| SNORA12   | 1.185      | 0.701      | 0.965      | 0.000     | 0.207     | 0.496     | 0.246   | -2.021 | 0.023   | 1.630       |
| U2AF1L4   | 0.527      | 1.168      | 0.965      | 0.183     | 0.207     | 0.284     | 0.253   | -1.982 | 0.026   | 1.586       |
| PTGER1    | 0.659      | 0.409      | 0.689      | 0.183     | 0.000     | 0.284     | 0.266   | -1.912 | 0.024   | 1.618       |
| AREG      | 17.255     | 16.356     | 22.890     | 4.585     | 5.920     | 4.678     | 0.269   | -1.896 | 0.003   | 2.562       |
| HMG1A1P8  | 0.724      | 0.526      | 0.689      | 0.183     | 0.069     | 0.284     | 0.276   | -1.856 | 0.006   | 2.235       |
| FGFR1     | 1.581      | 0.701      | 1.103      | 0.489     | 0.239     | 0.213     | 0.278   | -1.847 | 0.039   | 1.410       |
| MINDY4    | 0.263      | 0.467      | 0.414      | 0.183     | 0.069     | 0.071     | 0.282   | -1.824 | 0.019   | 1.724       |
| EREG      | 93.983     | 83.589     | 82.457     | 21.764    | 22.853    | 29.701    | 0.286   | -1.807 | 0.000   | 3.818       |
| PTGES2-AS | 1.317      | 0.876      | 0.827      | 0.306     | 0.207     | 0.354     | 0.287   | -1.801 | 0.011   | 1.945       |
| BCAT1     | 7.640      | 7.068      | 8.135      | 1.345     | 2.891     | 2.339     | 0.288   | -1.797 | 0.001   | 3.234       |
| TTBK1     | 0.132      | 0.175      | 0.138      | 0.061     | 0.069     | 0.000     | 0.292   | -1.775 | 0.015   | 1.824       |
| PDGFA     | 17.058     | 16.239     | 12.962     | 5.559     | 4.673     | 3.357     | 0.294   | -1.767 | 0.001   | 2.825       |
| PJVK      | 0.395      | 0.584      | 0.414      | 0.061     | 0.207     | 0.142     | 0.294   | -1.767 | 0.011   | 1.955       |
| SLFNL1-AS | 0.395      | 0.759      | 0.620      | 0.122     | 0.069     | 0.354     | 0.307   | -1.702 | 0.041   | 1.389       |
| ACMSD     | 1.515      | 1.051      | 0.689      | 0.245     | 0.551     | 0.213     | 0.310   | -1.692 | 0.046   | 1.338       |
| RGS1      | 4.940      | 4.381      | 7.584      | 1.039     | 1.927     | 2.268     | 0.310   | -1.691 | 0.021   | 1.678       |
| ASNS      | 1.976      | 2.278      | 2.137      | 0.856     | 0.620     | 0.567     | 0.320   | -1.646 | 0.000   | 3.506       |
| SLC2A5    | 0.724      | 0.643      | 0.483      | 0.245     | 0.069     | 0.284     | 0.323   | -1.632 | 0.013   | 1.900       |
| PSAT1     | 198.965    | 202.693    | 203.593    | 63.520    | 62.778    | 70.035    | 0.324   | -1.624 | 0.000   | 6.032       |
| FAM129A   | 3.622      | 3.446      | 5.584      | 1.406     | 2.065     | 0.780     | 0.336   | -1.574 | 0.023   | 1.641       |
| C11orf44  | 0.856      | 0.701      | 0.827      | 0.183     | 0.620     | 0.000     | 0.337   | -1.570 | 0.050   | 1.301       |
| OR7E12P   | 0.329      | 0.292      | 0.345      | 0.122     | 0.207     | 0.000     | 0.340   | -1.555 | 0.027   | 1.576       |
| INHBE     | 1.910      | 2.278      | 2.413      | 1.100     | 0.757     | 0.425     | 0.346   | -1.532 | 0.004   | 2.370       |
| SPX       | 7.706      | 8.003      | 7.515      | 2.201     | 2.272     | 3.615     | 0.348   | -1.522 | 0.000   | 3.329       |
| SLC04A1-? | 1.185      | 1.110      | 1.517      | 0.428     | 0.688     | 0.213     | 0.349   | -1.520 | 0.011   | 1.950       |
| CCND3     | 58.879     | 59.815     | 63.842     | 23.040    | 17.309    | 23.311    | 0.349   | -1.520 | 0.000   | 4.048       |
| ALDH1L2   | 23.512     | 27.220     | 26.061     | 7.397     | 10.257    | 9.144     | 0.349   | -1.519 | 0.000   | 3.575       |
| CCNE2     | 11.921     | 14.194     | 11.445     | 3.559     | 4.949     | 4.648     | 0.350   | -1.514 | 0.001   | 2.995       |
| EFNA5     | 23.380     | 24.066     | 24.475     | 6.114     | 9.962     | 9.210     | 0.352   | -1.508 | 0.000   | 3.660       |
| MTG1      | 1.712      | 1.752      | 2.344      | 0.306     | 0.551     | 1.205     | 0.355   | -1.495 | 0.021   | 1.682       |
| ZMAT4     | 1.515      | 1.227      | 1.103      | 0.183     | 0.551     | 0.638     | 0.357   | -1.486 | 0.011   | 1.950       |
| PPIAP31   | 1.712      | 1.519      | 1.448      | 0.428     | 0.964     | 0.284     | 0.358   | -1.482 | 0.011   | 1.973       |
| TAS2R20   | 1.712      | 2.804      | 2.137      | 0.978     | 0.413     | 0.992     | 0.358   | -1.481 | 0.018   | 1.734       |
| TOMM20L   | 0.593      | 0.643      | 0.689      | 0.061     | 0.275     | 0.354     | 0.359   | -1.478 | 0.011   | 1.957       |
| TNN1      | 1.778      | 2.161      | 1.241      | 1.100     | 0.207     | 0.567     | 0.362   | -1.467 | 0.042   | 1.381       |
| FAM35BP   | 0.659      | 0.584      | 0.827      | 0.061     | 0.344     | 0.354     | 0.367   | -1.446 | 0.022   | 1.658       |
| E2F8      | 16.729     | 18.400     | 16.753     | 5.315     | 6.949     | 6.932     | 0.370   | -1.435 | 0.000   | 3.830       |
| CLDN20    | 0.461      | 0.350      | 0.483      | 0.061     | 0.207     | 0.213     | 0.371   | -1.430 | 0.013   | 1.871       |
| ANGPTL1   | 0.593      | 0.584      | 0.483      | 0.061     | 0.344     | 0.213     | 0.372   | -1.425 | 0.018   | 1.755       |
| RHOXF1-AS | 1.317      | 0.876      | 0.689      | 0.306     | 0.207     | 0.567     | 0.374   | -1.417 | 0.049   | 1.310       |
| KRBA2     | 0.329      | 0.409      | 0.483      | 0.183     | 0.138     | 0.142     | 0.379   | -1.399 | 0.006   | 2.250       |
| STC2      | 49.395     | 48.424     | 48.813     | 18.952    | 18.241    | 18.997    | 0.383   | -1.384 | 0.000   | 6.850       |
| PTGS2     | 96.354     | 99.594     | 98.728     | 37.171    | 38.066    | 37.994    | 0.384   | -1.380 | 0.000   | 6.331       |
| NPR3      | 16.992     | 20.036     | 16.891     | 6.175     | 8.123     | 6.521     | 0.386   | -1.373 | 0.001   | 3.119       |
| HMCN1     | 20.614     | 14.311     | 13.030     | 6.664     | 7.021     | 5.033     | 0.390   | -1.357 | 0.016   | 1.801       |
| MYC       | 157.999    | 168.697    | 173.947    | 71.792    | 60.043    | 63.816    | 0.391   | -1.355 | 0.000   | 4.197       |
| GTF2IP7   | 12.316     | 13.493     | 18.615     | 4.585     | 6.952     | 5.883     | 0.392   | -1.351 | 0.012   | 1.928       |
| MCF2L2    | 1.647      | 2.453      | 1.930      | 0.856     | 1.033     | 0.496     | 0.395   | -1.338 | 0.013   | 1.890       |
| AFAP1-AS  | 3.820      | 2.453      | 3.654      | 1.162     | 1.377     | 1.418     | 0.398   | -1.327 | 0.010   | 1.981       |
| ZNF710-AS | 1.844      | 1.343      | 1.793      | 0.795     | 0.344     | 0.851     | 0.400   | -1.324 | 0.012   | 1.937       |
| COL6A3    | 45.510     | 43.810     | 43.090     | 17.546    | 14.937    | 20.911    | 0.403   | -1.310 | 0.000   | 3.830       |
| KCTD9P2   | 0.659      | 0.467      | 0.552      | 0.122     | 0.138     | 0.425     | 0.409   | -1.292 | 0.043   | 1.367       |
| FEM1A     | 1.054      | 1.519      | 0.965      | 0.489     | 0.757     | 0.213     | 0.412   | -1.278 | 0.041   | 1.389       |
| ITPKA     | 22.985     | 27.104     | 25.303     | 11.555    | 10.325    | 9.357     | 0.414   | -1.271 | 0.000   | 3.395       |
| RPL4P5    | 1.581      | 1.285      | 1.103      | 0.245     | 0.413     | 0.992     | 0.416   | -1.266 | 0.044   | 1.359       |

|           |         |         |         |         |         |         |       |        |       |       |
|-----------|---------|---------|---------|---------|---------|---------|-------|--------|-------|-------|
| CXCL17    | 3.030   | 3.271   | 4.481   | 1.712   | 1.652   | 1.134   | 0.417 | -1.261 | 0.012 | 1.904 |
| VEGFA     | 128.165 | 143.696 | 152.298 | 69.643  | 59.017  | 48.525  | 0.418 | -1.259 | 0.001 | 3.041 |
| RNU6-26P  | 1.515   | 2.687   | 2.137   | 0.550   | 0.688   | 1.418   | 0.419 | -1.255 | 0.047 | 1.328 |
| STARD4    | 35.631  | 37.209  | 31.370  | 15.345  | 14.731  | 14.461  | 0.427 | -1.226 | 0.000 | 3.453 |
| ADM2      | 4.874   | 6.017   | 4.275   | 1.467   | 2.891   | 2.127   | 0.428 | -1.226 | 0.012 | 1.936 |
| OLFM2     | 1.976   | 1.928   | 1.034   | 0.795   | 0.482   | 0.851   | 0.431 | -1.215 | 0.046 | 1.340 |
| ZNF773    | 0.461   | 0.759   | 0.620   | 0.306   | 0.207   | 0.284   | 0.432 | -1.210 | 0.019 | 1.725 |
| FAM86B1   | 1.910   | 1.986   | 2.689   | 1.039   | 0.964   | 0.851   | 0.433 | -1.206 | 0.008 | 2.094 |
| FGF2      | 15.807  | 15.772  | 13.168  | 7.336   | 5.463   | 6.640   | 0.434 | -1.203 | 0.001 | 2.916 |
| KCNE4     | 36.750  | 35.048  | 36.816  | 16.384  | 15.006  | 16.091  | 0.437 | -1.194 | 0.000 | 5.046 |
| ASB4      | 5.598   | 5.666   | 6.205   | 1.956   | 2.409   | 3.332   | 0.441 | -1.182 | 0.002 | 2.722 |
| IL2ORB    | 4.149   | 5.958   | 5.584   | 1.712   | 2.478   | 2.765   | 0.443 | -1.174 | 0.010 | 1.995 |
| PHGDH     | 55.191  | 57.887  | 61.085  | 27.695  | 25.676  | 24.739  | 0.448 | -1.157 | 0.000 | 4.126 |
| CPHL1P    | 6.323   | 7.535   | 6.757   | 2.507   | 2.960   | 3.828   | 0.451 | -1.149 | 0.002 | 2.701 |
| TRPM8     | 0.461   | 0.701   | 0.620   | 0.245   | 0.138   | 0.425   | 0.453 | -1.142 | 0.041 | 1.383 |
| TM4SF4    | 6.323   | 4.264   | 3.654   | 2.690   | 2.134   | 1.630   | 0.453 | -1.142 | 0.040 | 1.401 |
| SLC1A2    | 3.030   | 4.030   | 3.378   | 1.834   | 1.377   | 1.559   | 0.457 | -1.130 | 0.004 | 2.375 |
| JAZF1     | 10.143  | 7.944   | 9.721   | 4.524   | 4.956   | 3.332   | 0.461 | -1.118 | 0.004 | 2.416 |
| CDKL3     | 0.659   | 0.584   | 0.620   | 0.367   | 0.138   | 0.354   | 0.461 | -1.117 | 0.012 | 1.906 |
| TM4SF19   | 7.574   | 6.250   | 7.860   | 3.301   | 2.960   | 3.757   | 0.462 | -1.114 | 0.002 | 2.685 |
| CNKSR2    | 7.640   | 9.521   | 10.893  | 4.585   | 4.061   | 4.324   | 0.462 | -1.113 | 0.006 | 2.205 |
| VSIG1     | 295.384 | 298.257 | 287.084 | 135.416 | 138.842 | 139.502 | 0.470 | -1.090 | 0.000 | 5.776 |
| LAD1      | 75.542  | 69.979  | 68.117  | 38.088  | 33.867  | 29.772  | 0.476 | -1.070 | 0.000 | 3.469 |
| RPP21     | 0.724   | 0.876   | 1.034   | 0.489   | 0.275   | 0.496   | 0.478 | -1.064 | 0.016 | 1.785 |
| CLSPN     | 31.218  | 25.118  | 26.888  | 14.306  | 14.662  | 11.058  | 0.481 | -1.056 | 0.003 | 2.592 |
| TUBA1A    | 1.383   | 2.103   | 1.517   | 0.734   | 0.826   | 0.851   | 0.482 | -1.054 | 0.018 | 1.741 |
| NECAB1    | 6.191   | 6.542   | 6.412   | 2.507   | 3.511   | 3.261   | 0.485 | -1.045 | 0.000 | 3.303 |
| FAM156A   | 0.527   | 0.818   | 0.827   | 0.428   | 0.413   | 0.213   | 0.485 | -1.044 | 0.037 | 1.438 |
| C6orf223  | 3.227   | 4.439   | 4.688   | 2.079   | 1.652   | 2.268   | 0.486 | -1.042 | 0.012 | 1.916 |
| FBX036    | 7.772   | 5.199   | 6.825   | 3.729   | 2.822   | 3.119   | 0.489 | -1.034 | 0.013 | 1.875 |
| SCG2      | 1.581   | 1.227   | 1.310   | 0.489   | 0.964   | 0.567   | 0.491 | -1.027 | 0.018 | 1.737 |
| CDCP1     | 4.215   | 5.432   | 4.412   | 2.445   | 1.859   | 2.623   | 0.493 | -1.021 | 0.006 | 2.238 |
| POLR3G    | 12.513  | 14.603  | 12.548  | 6.970   | 7.159   | 5.458   | 0.494 | -1.018 | 0.002 | 2.803 |
| CALCRL    | 0.527   | 0.759   | 0.896   | 0.245   | 0.413   | 0.425   | 0.496 | -1.011 | 0.040 | 1.394 |
| MILR1     | 12.843  | 13.844  | 14.271  | 6.908   | 6.746   | 6.734   | 0.498 | -1.006 | 0.000 | 4.055 |
| SLC38A5   | 26.015  | 24.826  | 27.922  | 13.083  | 12.941  | 13.326  | 0.500 | -1.001 | 0.000 | 3.875 |
| TRIM31    | 42.546  | 44.978  | 43.711  | 83.512  | 94.374  | 85.062  | 2.004 | 1.003  | 0.000 | 3.651 |
| TBC1D3L   | 1.976   | 1.227   | 1.448   | 3.668   | 2.616   | 3.048   | 2.007 | 1.005  | 0.014 | 1.839 |
| PIK3CD    | 1.647   | 2.453   | 1.999   | 3.240   | 4.474   | 4.537   | 2.009 | 1.006  | 0.013 | 1.881 |
| METTL27   | 2.832   | 4.381   | 2.620   | 7.031   | 6.746   | 6.025   | 2.014 | 1.010  | 0.006 | 2.207 |
| IL3RA     | 0.198   | 0.701   | 0.758   | 1.100   | 0.964   | 1.276   | 2.016 | 1.011  | 0.048 | 1.315 |
| KIF20A    | 97.013  | 94.162  | 101.486 | 198.876 | 197.352 | 194.580 | 2.019 | 1.013  | 0.000 | 5.639 |
| UBALD2    | 50.054  | 57.070  | 48.813  | 107.966 | 107.590 | 99.806  | 2.022 | 1.016  | 0.000 | 3.865 |
| C1QTNF1   | 19.626  | 19.276  | 22.131  | 42.000  | 40.200  | 41.255  | 2.023 | 1.016  | 0.000 | 4.434 |
| CYP2S1    | 63.555  | 70.329  | 77.976  | 148.866 | 142.215 | 138.014 | 2.025 | 1.018  | 0.000 | 3.803 |
| BAIAP3    | 8.694   | 6.192   | 8.204   | 15.529  | 14.593  | 16.658  | 2.026 | 1.019  | 0.001 | 2.906 |
| KRT80     | 9.352   | 8.996   | 8.756   | 17.240  | 19.205  | 18.572  | 2.030 | 1.021  | 0.000 | 3.984 |
| GDPD3     | 0.724   | 0.993   | 0.827   | 1.528   | 2.134   | 1.559   | 2.052 | 1.037  | 0.014 | 1.868 |
| COQ8A     | 19.824  | 19.685  | 21.166  | 44.079  | 37.860  | 42.744  | 2.055 | 1.039  | 0.000 | 3.403 |
| TRAV19    | 0.263   | 0.467   | 0.758   | 1.100   | 0.826   | 1.134   | 2.055 | 1.039  | 0.039 | 1.406 |
| C4orf36   | 2.042   | 1.869   | 2.206   | 4.341   | 4.337   | 3.899   | 2.056 | 1.040  | 0.000 | 3.591 |
| AASS      | 2.371   | 1.402   | 2.413   | 3.974   | 3.648   | 5.175   | 2.069 | 1.049  | 0.018 | 1.744 |
| PI15      | 0.856   | 1.227   | 0.483   | 1.773   | 1.859   | 1.701   | 2.079 | 1.056  | 0.014 | 1.864 |
| VASH1     | 1.317   | 1.285   | 1.310   | 3.546   | 2.685   | 1.914   | 2.082 | 1.058  | 0.040 | 1.395 |
| RGS11     | 1.054   | 1.168   | 0.965   | 1.956   | 2.340   | 2.339   | 2.082 | 1.058  | 0.001 | 2.913 |
| HCG15     | 0.461   | 0.234   | 0.483   | 0.856   | 0.826   | 0.780   | 2.091 | 1.064  | 0.007 | 2.180 |
| ZSCAN12P  | 0.593   | 0.818   | 0.689   | 1.406   | 1.721   | 1.276   | 2.097 | 1.068  | 0.006 | 2.190 |
| MAP1LC3A  | 8.496   | 9.521   | 7.170   | 17.974  | 17.828  | 17.012  | 2.097 | 1.068  | 0.000 | 3.612 |
| NT5M      | 0.922   | 1.343   | 0.896   | 2.323   | 2.203   | 2.127   | 2.104 | 1.073  | 0.002 | 2.764 |
| PDK4      | 6.454   | 7.360   | 6.067   | 13.694  | 13.561  | 14.602  | 2.105 | 1.074  | 0.000 | 3.886 |
| BDNF-AS   | 0.461   | 0.350   | 0.276   | 0.611   | 0.757   | 0.922   | 2.106 | 1.075  | 0.019 | 1.732 |
| NDRG2     | 2.964   | 3.096   | 2.620   | 6.358   | 5.989   | 5.954   | 2.109 | 1.076  | 0.000 | 4.124 |
| TINAGL1   | 21.207  | 23.132  | 27.440  | 56.306  | 51.283  | 44.020  | 2.112 | 1.079  | 0.003 | 2.571 |
| CDC42BPG  | 1.712   | 1.051   | 1.310   | 2.690   | 3.511   | 2.410   | 2.114 | 1.080  | 0.017 | 1.777 |
| AMH       | 1.317   | 0.643   | 1.241   | 1.895   | 2.822   | 2.056   | 2.116 | 1.081  | 0.029 | 1.539 |
| CPNE5     | 0.922   | 0.467   | 0.827   | 1.773   | 1.377   | 1.559   | 2.124 | 1.087  | 0.010 | 2.006 |
| DAPK2     | 8.694   | 11.741  | 10.135  | 20.664  | 23.817  | 20.486  | 2.125 | 1.088  | 0.001 | 2.923 |
| DNAH1     | 13.501  | 11.332  | 12.824  | 27.022  | 28.085  | 25.093  | 2.130 | 1.091  | 0.000 | 3.704 |
| SYNP0     | 6.388   | 3.855   | 6.894   | 10.943  | 12.941  | 12.759  | 2.138 | 1.096  | 0.005 | 2.336 |
| CAPN10-AS | 1.185   | 1.168   | 0.414   | 2.017   | 2.272   | 1.630   | 2.139 | 1.097  | 0.029 | 1.536 |
| OSER1-AS  | 1.647   | 1.752   | 2.413   | 3.852   | 3.924   | 4.678   | 2.143 | 1.099  | 0.003 | 2.464 |
| PKD1P6    | 6.718   | 7.360   | 6.274   | 16.384  | 12.803  | 14.531  | 2.148 | 1.103  | 0.002 | 2.706 |
| RGL3      | 1.120   | 1.694   | 0.689   | 2.201   | 2.340   | 3.048   | 2.167 | 1.115  | 0.025 | 1.595 |
| LRRC75B   | 2.108   | 2.862   | 0.689   | 3.974   | 4.543   | 3.757   | 2.169 | 1.117  | 0.031 | 1.503 |
| CRTC1     | 6.652   | 5.316   | 4.619   | 14.550  | 10.945  | 10.633  | 2.178 | 1.123  | 0.009 | 2.025 |
| PDK2      | 5.862   | 5.549   | 5.653   | 13.572  | 13.974  | 9.640   | 2.179 | 1.124  | 0.008 | 2.076 |
| SOST      | 0.132   | 0.292   | 0.483   | 0.795   | 0.620   | 0.567   | 2.186 | 1.128  | 0.043 | 1.366 |
| AQP3      | 13.897  | 13.610  | 14.547  | 32.402  | 30.081  | 29.488  | 2.187 | 1.129  | 0.000 | 4.239 |
| MXD4      | 15.016  | 17.290  | 12.548  | 30.201  | 34.969  | 33.033  | 2.189 | 1.131  | 0.001 | 3.098 |
| IRS2      | 6.323   | 7.535   | 7.308   | 14.795  | 14.456  | 17.154  | 2.192 | 1.133  | 0.001 | 3.088 |
| TAS2R4    | 0.329   | 0.292   | 0.345   | 0.795   | 0.688   | 0.638   | 2.196 | 1.135  | 0.001 | 2.856 |
| ETV7      | 0.132   | 0.292   | 0.207   | 0.489   | 0.482   | 0.425   | 2.214 | 1.147  | 0.007 | 2.141 |
| IL37      | 0.132   | 0.117   | 0.138   | 0.367   | 0.207   | 0.284   | 2.217 | 1.149  | 0.028 | 1.547 |
| RCBTB2    | 1.383   | 2.103   | 2.275   | 3.668   | 4.887   | 4.253   | 2.223 | 1.153  | 0.006 | 2.207 |

|           |        |        |        |         |         |         |       |       |       |       |
|-----------|--------|--------|--------|---------|---------|---------|-------|-------|-------|-------|
| VASN      | 4.610  | 5.024  | 2.551  | 8.804   | 8.191   | 10.137  | 2.227 | 1.155 | 0.006 | 2.189 |
| C1QL1     | 1.317  | 0.584  | 0.689  | 2.507   | 1.583   | 1.701   | 2.235 | 1.160 | 0.045 | 1.350 |
| ACTL8     | 1.712  | 3.154  | 2.551  | 5.441   | 4.887   | 6.309   | 2.243 | 1.165 | 0.006 | 2.194 |
| TAGLN     | 1.515  | 0.759  | 1.517  | 2.751   | 2.960   | 2.835   | 2.254 | 1.173 | 0.004 | 2.441 |
| SCNN1A    | 12.645 | 12.968 | 14.754 | 30.629  | 29.531  | 31.402  | 2.268 | 1.182 | 0.000 | 4.437 |
| SMGIP4    | 3.227  | 4.089  | 4.688  | 6.970   | 9.981   | 10.278  | 2.268 | 1.182 | 0.011 | 1.951 |
| LBX2      | 1.383  | 1.227  | 1.103  | 2.507   | 3.511   | 2.410   | 2.270 | 1.183 | 0.012 | 1.916 |
| TPM3P6    | 0.132  | 0.175  | 0.276  | 0.489   | 0.413   | 0.425   | 2.278 | 1.188 | 0.007 | 2.154 |
| C3        | 1.185  | 1.285  | 1.172  | 2.201   | 2.340   | 3.757   | 2.278 | 1.188 | 0.036 | 1.447 |
| RNPS1P1   | 0.066  | 0.117  | 0.138  | 0.245   | 0.207   | 0.284   | 2.291 | 1.196 | 0.011 | 1.957 |
| NR6A1     | 2.437  | 1.928  | 1.586  | 4.280   | 4.956   | 4.466   | 2.303 | 1.203 | 0.001 | 2.898 |
| KLRC2     | 3.425  | 2.512  | 3.654  | 7.336   | 5.851   | 8.932   | 2.306 | 1.206 | 0.012 | 1.922 |
| GPR176    | 1.515  | 2.337  | 3.102  | 6.358   | 5.025   | 4.678   | 2.310 | 1.208 | 0.012 | 1.938 |
| OR211P    | 9.418  | 9.171  | 10.824 | 20.909  | 26.571  | 20.557  | 2.313 | 1.210 | 0.003 | 2.511 |
| SPINK1    | 22.129 | 24.709 | 22.614 | 49.153  | 54.931  | 56.850  | 2.317 | 1.212 | 0.000 | 3.624 |
| SOX18     | 1.185  | 1.460  | 2.758  | 5.563   | 3.235   | 3.757   | 2.324 | 1.216 | 0.050 | 1.305 |
| MREG      | 0.263  | 0.350  | 0.207  | 0.795   | 0.620   | 0.496   | 2.328 | 1.219 | 0.019 | 1.710 |
| ACBD7     | 0.856  | 1.752  | 1.448  | 2.873   | 3.098   | 3.473   | 2.328 | 1.219 | 0.005 | 2.325 |
| NP1PB2    | 2.371  | 2.220  | 1.034  | 4.646   | 3.992   | 4.608   | 2.355 | 1.236 | 0.006 | 2.237 |
| ERBB3     | 64.807 | 55.843 | 61.498 | 144.587 | 139.048 | 148.930 | 2.375 | 1.248 | 0.000 | 4.561 |
| AGBL1     | 0.724  | 0.526  | 0.483  | 1.528   | 1.101   | 1.489   | 2.377 | 1.249 | 0.007 | 2.163 |
| RPL12P14  | 1.778  | 0.818  | 1.379  | 3.424   | 2.891   | 3.190   | 2.391 | 1.258 | 0.004 | 2.354 |
| DEFB131B  | 0.461  | 0.409  | 0.207  | 0.917   | 1.101   | 0.567   | 2.401 | 1.264 | 0.045 | 1.345 |
| HNRNPA3P1 | 0.395  | 0.234  | 0.069  | 0.489   | 0.620   | 0.567   | 2.402 | 1.264 | 0.033 | 1.487 |
| GLIPR2    | 1.515  | 0.701  | 1.034  | 2.507   | 2.547   | 2.765   | 2.406 | 1.266 | 0.004 | 2.438 |
| RAB37     | 0.922  | 2.395  | 3.240  | 5.625   | 4.130   | 6.025   | 2.406 | 1.267 | 0.026 | 1.586 |
| FBXO16    | 0.066  | 0.292  | 0.138  | 0.428   | 0.344   | 0.425   | 2.415 | 1.272 | 0.032 | 1.500 |
| NP1PA5    | 1.449  | 1.694  | 1.930  | 3.301   | 5.094   | 3.899   | 2.423 | 1.277 | 0.012 | 1.938 |
| TMEM191A  | 0.922  | 0.584  | 0.552  | 1.651   | 2.134   | 1.205   | 2.425 | 1.278 | 0.029 | 1.537 |
| ATOH8     | 11.789 | 11.624 | 16.202 | 33.564  | 32.284  | 30.268  | 2.426 | 1.279 | 0.000 | 3.345 |
| EDARADD   | 0.395  | 0.526  | 0.000  | 0.795   | 0.757   | 0.709   | 2.455 | 1.296 | 0.049 | 1.308 |
| CECR2     | 0.198  | 0.467  | 0.758  | 1.345   | 0.826   | 1.347   | 2.472 | 1.305 | 0.042 | 1.374 |
| MEGF6     | 16.333 | 19.685 | 20.408 | 50.682  | 43.848  | 45.012  | 2.473 | 1.306 | 0.000 | 3.454 |
| UNC13A    | 0.988  | 1.460  | 1.172  | 3.057   | 2.960   | 3.119   | 2.523 | 1.335 | 0.000 | 3.651 |
| SPNS2     | 0.724  | 1.051  | 0.483  | 2.017   | 1.927   | 1.772   | 2.531 | 1.340 | 0.003 | 2.518 |
| RCN3      | 2.503  | 2.921  | 1.930  | 6.542   | 6.815   | 5.316   | 2.539 | 1.344 | 0.002 | 2.648 |
| RORC      | 2.042  | 1.110  | 0.896  | 4.402   | 2.616   | 3.261   | 2.539 | 1.344 | 0.030 | 1.523 |
| PTPRN2    | 0.922  | 0.935  | 0.345  | 2.262   | 1.790   | 1.559   | 2.549 | 1.350 | 0.016 | 1.793 |
| TMEM212   | 0.395  | 0.234  | 0.138  | 0.489   | 0.688   | 0.780   | 2.553 | 1.352 | 0.025 | 1.596 |
| CTSK      | 2.503  | 2.395  | 0.896  | 5.319   | 4.405   | 5.104   | 2.559 | 1.356 | 0.007 | 2.165 |
| AZIN2     | 0.659  | 0.526  | 0.138  | 1.162   | 1.308   | 0.922   | 2.565 | 1.359 | 0.023 | 1.635 |
| SESN3     | 0.593  | 0.876  | 1.034  | 2.017   | 2.134   | 2.268   | 2.565 | 1.359 | 0.001 | 3.039 |
| PRAF2     | 0.066  | 0.818  | 0.483  | 1.345   | 1.239   | 0.922   | 2.566 | 1.359 | 0.047 | 1.325 |
| UBBP4     | 0.461  | 0.993  | 0.276  | 1.162   | 1.790   | 1.489   | 2.567 | 1.360 | 0.033 | 1.488 |
| PIK3IP1   | 3.030  | 4.615  | 2.344  | 8.987   | 7.641   | 9.073   | 2.573 | 1.364 | 0.003 | 2.517 |
| MRAS      | 0.790  | 0.175  | 0.276  | 1.039   | 1.033   | 1.134   | 2.583 | 1.369 | 0.028 | 1.559 |
| TXK       | 1.251  | 1.636  | 2.275  | 2.935   | 4.405   | 6.025   | 2.589 | 1.372 | 0.044 | 1.358 |
| EFCAB12   | 0.461  | 0.526  | 1.103  | 1.467   | 2.203   | 1.772   | 2.604 | 1.381 | 0.019 | 1.713 |
| PAPLN     | 5.993  | 5.316  | 3.034  | 10.882  | 15.075  | 11.413  | 2.606 | 1.382 | 0.009 | 2.069 |
| ZNF219    | 1.054  | 1.343  | 0.896  | 3.301   | 2.478   | 2.835   | 2.616 | 1.387 | 0.003 | 2.545 |
| FAM167B   | 0.132  | 0.175  | 0.000  | 0.245   | 0.275   | 0.284   | 2.617 | 1.388 | 0.037 | 1.426 |
| CCDC148   | 0.659  | 1.285  | 0.207  | 1.528   | 1.927   | 2.197   | 2.629 | 1.394 | 0.034 | 1.471 |
| NR3C2     | 0.856  | 1.051  | 0.965  | 1.528   | 3.373   | 2.694   | 2.644 | 1.403 | 0.044 | 1.358 |
| AZGP1     | 3.359  | 2.453  | 3.034  | 6.542   | 9.844   | 7.018   | 2.646 | 1.404 | 0.010 | 1.986 |
| ASPDH     | 0.395  | 0.234  | 0.207  | 0.550   | 1.033   | 0.638   | 2.657 | 1.410 | 0.044 | 1.353 |
| ROBO3     | 1.515  | 0.876  | 0.414  | 1.651   | 2.685   | 3.119   | 2.658 | 1.410 | 0.045 | 1.342 |
| NEIL1     | 0.527  | 0.350  | 0.965  | 1.590   | 1.927   | 1.418   | 2.678 | 1.421 | 0.012 | 1.920 |
| PSORS1C3  | 0.724  | 0.701  | 0.620  | 1.651   | 1.652   | 2.197   | 2.688 | 1.427 | 0.003 | 2.472 |
| HIST1H2AC | 7.113  | 6.834  | 7.998  | 18.585  | 19.136  | 21.549  | 2.701 | 1.433 | 0.000 | 3.662 |
| VKORC1    | 0.066  | 0.117  | 0.207  | 0.428   | 0.344   | 0.284   | 2.710 | 1.438 | 0.019 | 1.711 |
| KRT7      | 5.862  | 6.776  | 7.170  | 17.240  | 19.894  | 16.587  | 2.712 | 1.439 | 0.000 | 3.323 |
| YPEL3     | 8.628  | 8.295  | 8.549  | 25.555  | 23.886  | 20.628  | 2.751 | 1.460 | 0.001 | 3.292 |
| PKD1P5    | 0.988  | 0.350  | 0.965  | 2.201   | 1.514   | 2.694   | 2.782 | 1.476 | 0.027 | 1.570 |
| KLF2      | 2.503  | 3.154  | 4.275  | 9.109   | 10.807  | 7.797   | 2.790 | 1.481 | 0.004 | 2.371 |
| CYP26B1   | 4.610  | 4.498  | 3.723  | 11.738  | 12.253  | 11.838  | 2.792 | 1.481 | 0.000 | 4.743 |
| TBC1D3D   | 0.988  | 0.759  | 0.207  | 1.834   | 2.409   | 1.276   | 2.824 | 1.498 | 0.041 | 1.383 |
| TXNIP     | 14.884 | 13.493 | 13.030 | 37.232  | 41.026  | 39.129  | 2.835 | 1.503 | 0.000 | 4.485 |
| CYP2T1P   | 0.198  | 0.175  | 0.138  | 0.611   | 0.413   | 0.425   | 2.839 | 1.505 | 0.009 | 2.034 |
| STMN3     | 1.317  | 1.402  | 1.379  | 3.607   | 4.130   | 3.899   | 2.839 | 1.506 | 0.000 | 4.089 |
| TOB1-AS1  | 0.263  | 0.117  | 0.276  | 0.611   | 0.620   | 0.638   | 2.849 | 1.510 | 0.001 | 2.842 |
| PSCA      | 0.132  | 0.701  | 0.483  | 0.978   | 1.308   | 1.489   | 2.870 | 1.521 | 0.021 | 1.671 |
| FAM78A    | 0.593  | 0.467  | 0.620  | 1.773   | 1.790   | 1.347   | 2.921 | 1.547 | 0.002 | 2.674 |
| KLHDC9    | 1.120  | 0.701  | 1.241  | 2.262   | 3.924   | 2.765   | 2.923 | 1.548 | 0.019 | 1.714 |
| HIST1H1C  | 6.059  | 6.659  | 8.480  | 19.747  | 19.962  | 22.329  | 2.927 | 1.549 | 0.000 | 3.608 |
| PDZK1IP1  | 0.988  | 0.876  | 2.413  | 4.952   | 4.474   | 3.119   | 2.933 | 1.552 | 0.020 | 1.692 |
| PKIA-AS1  | 0.198  | 0.234  | 0.207  | 0.550   | 0.826   | 0.496   | 2.935 | 1.553 | 0.016 | 1.795 |
| HIST1H2AI | 0.263  | 0.467  | 0.620  | 1.100   | 1.308   | 1.559   | 2.936 | 1.554 | 0.007 | 2.181 |
| RPL13AP2  | 0.593  | 0.234  | 0.276  | 1.284   | 1.033   | 0.922   | 2.938 | 1.555 | 0.010 | 1.987 |
| FAM20C    | 0.724  | 0.292  | 0.552  | 1.467   | 1.652   | 1.489   | 2.939 | 1.555 | 0.002 | 2.731 |
| ASPHD2    | 0.198  | 0.117  | 0.138  | 0.489   | 0.344   | 0.496   | 2.939 | 1.556 | 0.006 | 2.217 |
| LTBP2     | 1.251  | 0.993  | 1.172  | 3.790   | 3.511   | 2.765   | 2.946 | 1.559 | 0.002 | 2.665 |
| SDR42E1   | 0.000  | 0.175  | 0.207  | 0.428   | 0.275   | 0.425   | 2.954 | 1.563 | 0.038 | 1.417 |
| PPL       | 0.856  | 1.402  | 1.310  | 3.974   | 3.098   | 3.473   | 2.955 | 1.563 | 0.002 | 2.800 |
| SEMA6C    | 3.688  | 3.096  | 2.482  | 10.699  | 7.021   | 9.711   | 2.960 | 1.566 | 0.006 | 2.202 |

|           |        |        |        |        |        |        |       |       |       |       |
|-----------|--------|--------|--------|--------|--------|--------|-------|-------|-------|-------|
| NLRC4     | 0.329  | 0.234  | 0.414  | 0.856  | 0.826  | 1.276  | 3.029 | 1.599 | 0.013 | 1.891 |
| BMF       | 16.268 | 13.026 | 13.375 | 40.289 | 43.780 | 45.579 | 3.038 | 1.603 | 0.000 | 4.003 |
| RND1      | 5.993  | 4.498  | 7.515  | 15.895 | 17.278 | 21.691 | 3.047 | 1.607 | 0.003 | 2.487 |
| HIST1H2BI | 3.359  | 2.629  | 3.378  | 9.660  | 11.977 | 7.018  | 3.060 | 1.613 | 0.011 | 1.940 |
| RPS10     | 0.329  | 0.467  | 0.000  | 0.856  | 0.895  | 0.709  | 3.088 | 1.626 | 0.021 | 1.682 |
| KRT7-AS   | 0.132  | 0.000  | 0.276  | 0.489  | 0.344  | 0.425  | 3.089 | 1.627 | 0.034 | 1.463 |
| FBP1      | 0.461  | 0.350  | 0.620  | 1.345  | 0.964  | 2.127  | 3.097 | 1.631 | 0.046 | 1.334 |
| SEMA4D    | 0.132  | 0.350  | 0.414  | 1.039  | 1.170  | 0.567  | 3.099 | 1.632 | 0.036 | 1.442 |
| SATB1     | 0.329  | 0.584  | 0.620  | 1.834  | 1.859  | 1.063  | 3.100 | 1.632 | 0.018 | 1.749 |
| SCARF1    | 1.120  | 0.701  | 0.207  | 2.323  | 2.409  | 1.559  | 3.103 | 1.634 | 0.020 | 1.706 |
| HIST1H2BC | 1.120  | 1.110  | 0.276  | 3.118  | 2.753  | 1.914  | 3.108 | 1.636 | 0.018 | 1.750 |
| C6orf222  | 3.425  | 5.724  | 6.136  | 16.874 | 12.597 | 18.218 | 3.120 | 1.641 | 0.005 | 2.331 |
| SAMD11    | 4.544  | 5.432  | 4.688  | 15.651 | 13.974 | 16.162 | 3.122 | 1.643 | 0.000 | 3.880 |
| AHRR      | 0.922  | 0.876  | 1.034  | 2.507  | 3.235  | 3.119  | 3.128 | 1.645 | 0.001 | 3.018 |
| SMG1P3    | 1.515  | 2.103  | 1.448  | 4.646  | 5.645  | 5.600  | 3.137 | 1.649 | 0.001 | 3.136 |
| NPIPA8    | 0.395  | 0.292  | 0.138  | 0.795  | 1.239  | 0.567  | 3.152 | 1.656 | 0.049 | 1.314 |
| WNT2B     | 0.329  | 0.292  | 0.138  | 0.734  | 0.895  | 0.780  | 3.172 | 1.665 | 0.002 | 2.719 |
| ABTB1     | 13.436 | 10.398 | 11.927 | 39.983 | 38.617 | 34.946 | 3.175 | 1.667 | 0.000 | 3.927 |
| SERPIN11  | 0.922  | 0.584  | 0.345  | 1.895  | 2.753  | 1.276  | 3.201 | 1.678 | 0.042 | 1.378 |
| DGKA      | 0.659  | 0.759  | 0.345  | 1.895  | 1.996  | 1.772  | 3.213 | 1.684 | 0.001 | 3.118 |
| LFNG      | 1.712  | 3.271  | 2.344  | 9.598  | 8.123  | 5.954  | 3.231 | 1.692 | 0.009 | 2.042 |
| HIST2H2BI | 1.449  | 1.577  | 1.930  | 4.769  | 6.884  | 4.395  | 3.238 | 1.695 | 0.009 | 2.028 |
| SCARF2    | 0.329  | 0.584  | 0.207  | 1.467  | 1.239  | 0.922  | 3.238 | 1.695 | 0.012 | 1.906 |
| ANKHD1    | 0.066  | 0.292  | 0.620  | 1.100  | 1.377  | 0.709  | 3.256 | 1.703 | 0.043 | 1.365 |
| HIST1H2BI | 6.652  | 6.776  | 3.861  | 19.258 | 18.792 | 18.288 | 3.259 | 1.704 | 0.000 | 3.710 |
| PCDHGB9P  | 0.132  | 0.117  | 0.000  | 0.183  | 0.344  | 0.284  | 3.263 | 1.706 | 0.040 | 1.395 |
| LRRC56    | 0.856  | 1.285  | 1.241  | 3.729  | 3.579  | 3.757  | 3.272 | 1.710 | 0.000 | 4.196 |
| HIST1H2AC | 0.527  | 0.993  | 0.896  | 3.179  | 2.340  | 2.410  | 3.282 | 1.715 | 0.004 | 2.423 |
| ZDHH1     | 0.659  | 0.234  | 0.207  | 1.528  | 0.826  | 1.276  | 3.303 | 1.724 | 0.029 | 1.542 |
| MIR514B   | 0.329  | 0.000  | 0.138  | 0.489  | 0.413  | 0.709  | 3.448 | 1.786 | 0.043 | 1.366 |
| SPDYA     | 0.527  | 0.643  | 0.000  | 0.978  | 1.790  | 1.276  | 3.458 | 1.790 | 0.036 | 1.443 |
| KCND1     | 0.132  | 0.467  | 1.310  | 2.201  | 2.065  | 2.339  | 3.460 | 1.791 | 0.012 | 1.918 |
| SYNGR3    | 0.856  | 1.051  | 0.138  | 3.118  | 2.616  | 1.347  | 3.461 | 1.791 | 0.048 | 1.319 |
| HR        | 5.335  | 6.192  | 5.240  | 17.607 | 18.930 | 21.620 | 3.469 | 1.794 | 0.000 | 3.460 |
| HAMP      | 0.461  | 0.350  | 0.000  | 0.734  | 1.308  | 0.780  | 3.477 | 1.798 | 0.044 | 1.357 |
| RCAN2     | 0.461  | 0.643  | 0.138  | 1.956  | 1.377  | 0.992  | 3.484 | 1.801 | 0.031 | 1.502 |
| OAZ3      | 0.066  | 0.409  | 0.207  | 0.917  | 0.826  | 0.638  | 3.493 | 1.805 | 0.012 | 1.928 |
| SSTR5     | 0.856  | 0.058  | 0.965  | 2.629  | 2.478  | 1.489  | 3.509 | 1.811 | 0.026 | 1.578 |
| ITGB8     | 0.132  | 0.701  | 0.965  | 2.262  | 1.859  | 2.197  | 3.514 | 1.813 | 0.005 | 2.262 |
| AMIGO1    | 0.000  | 0.584  | 0.207  | 1.039  | 0.620  | 1.134  | 3.531 | 1.820 | 0.046 | 1.340 |
| RAB3A     | 0.263  | 0.117  | 0.207  | 0.795  | 0.895  | 0.425  | 3.602 | 1.849 | 0.027 | 1.571 |
| CD160     | 0.066  | 0.818  | 0.138  | 1.039  | 1.446  | 1.205  | 3.612 | 1.853 | 0.029 | 1.537 |
| F10       | 0.198  | 0.350  | 0.207  | 0.978  | 0.757  | 0.992  | 3.613 | 1.853 | 0.002 | 2.714 |
| KIAA1324  | 0.461  | 0.000  | 0.207  | 0.611  | 0.688  | 1.134  | 3.644 | 1.866 | 0.049 | 1.310 |
| C1orf186  | 0.132  | 0.292  | 0.000  | 0.428  | 0.413  | 0.709  | 3.657 | 1.871 | 0.043 | 1.369 |
| ADAMTS13  | 1.185  | 1.343  | 0.689  | 3.974  | 4.543  | 3.332  | 3.681 | 1.880 | 0.002 | 2.697 |
| GAPDHP63  | 0.132  | 0.117  | 0.000  | 0.428  | 0.207  | 0.284  | 3.693 | 1.885 | 0.044 | 1.353 |
| ACOT11    | 0.856  | 1.636  | 0.965  | 4.218  | 5.232  | 3.332  | 3.697 | 1.886 | 0.007 | 2.179 |
| REPS2     | 0.527  | 0.935  | 0.414  | 2.507  | 2.409  | 2.056  | 3.718 | 1.894 | 0.001 | 2.902 |
| MATN2     | 0.659  | 0.526  | 0.276  | 1.773  | 1.859  | 1.843  | 3.749 | 1.907 | 0.000 | 3.502 |
| TRAM1L1   | 0.263  | 0.467  | 0.000  | 1.162  | 0.964  | 0.638  | 3.781 | 1.919 | 0.029 | 1.533 |
| AGAP7P    | 0.066  | 0.058  | 0.069  | 0.245  | 0.207  | 0.284  | 3.802 | 1.927 | 0.001 | 2.886 |
| SERPINB4  | 0.461  | 0.818  | 0.000  | 1.834  | 1.583  | 1.489  | 3.836 | 1.940 | 0.009 | 2.026 |
| C19orf57  | 0.593  | 0.292  | 0.000  | 1.100  | 0.895  | 1.418  | 3.857 | 1.948 | 0.021 | 1.674 |
| IL9RP3    | 0.329  | 0.117  | 0.000  | 0.672  | 0.413  | 0.638  | 3.863 | 1.950 | 0.028 | 1.554 |
| RNU6-116  | 0.198  | 0.292  | 0.000  | 0.611  | 0.826  | 0.496  | 3.949 | 1.981 | 0.020 | 1.689 |
| ITPR1-AS  | 0.132  | 0.234  | 0.000  | 0.611  | 0.275  | 0.567  | 3.979 | 1.992 | 0.044 | 1.354 |
| UGT2B15   | 0.000  | 0.584  | 0.000  | 0.917  | 0.826  | 0.638  | 4.076 | 2.027 | 0.047 | 1.327 |
| ADAM11    | 0.527  | 0.117  | 0.000  | 0.978  | 0.620  | 1.063  | 4.134 | 2.047 | 0.033 | 1.485 |
| FRMPD2B   | 0.066  | 0.234  | 0.069  | 0.611  | 0.275  | 0.638  | 4.138 | 2.049 | 0.041 | 1.391 |
| GPT       | 0.000  | 0.000  | 0.483  | 0.672  | 0.688  | 0.638  | 4.142 | 2.050 | 0.035 | 1.453 |
| ZNF35     | 0.132  | 0.175  | 0.345  | 0.856  | 1.101  | 0.780  | 4.200 | 2.070 | 0.004 | 2.398 |
| ADAMTS10  | 0.000  | 0.058  | 0.276  | 0.428  | 0.482  | 0.496  | 4.207 | 2.073 | 0.014 | 1.840 |
| GHRL      | 0.132  | 0.058  | 0.000  | 0.245  | 0.344  | 0.213  | 4.215 | 2.075 | 0.021 | 1.684 |
| RELN      | 0.263  | 0.234  | 0.207  | 0.795  | 0.895  | 1.347  | 4.314 | 2.109 | 0.010 | 1.985 |
| FAM151B   | 0.198  | 0.234  | 0.138  | 0.856  | 1.033  | 0.567  | 4.315 | 2.109 | 0.010 | 1.979 |
| RIPOR2    | 0.198  | 0.584  | 0.000  | 0.734  | 1.377  | 1.276  | 4.332 | 2.115 | 0.030 | 1.523 |
| CHRN4     | 0.132  | 0.175  | 0.000  | 0.428  | 0.620  | 0.284  | 4.336 | 2.116 | 0.037 | 1.435 |
| SPDYE18   | 0.198  | 0.175  | 0.069  | 0.672  | 0.482  | 0.780  | 4.378 | 2.130 | 0.007 | 2.185 |
| FOSB      | 0.461  | 0.759  | 0.896  | 3.057  | 2.891  | 3.402  | 4.418 | 2.143 | 0.000 | 3.583 |
| GACAT2    | 0.066  | 0.058  | 1.103  | 2.079  | 1.583  | 1.772  | 4.427 | 2.146 | 0.020 | 1.693 |
| USP2-AS1  | 0.000  | 0.350  | 0.069  | 0.550  | 0.482  | 0.851  | 4.489 | 2.166 | 0.035 | 1.453 |
| FAM157B   | 0.000  | 0.117  | 0.000  | 0.183  | 0.207  | 0.142  | 4.551 | 2.186 | 0.033 | 1.480 |
| CYP11A1   | 0.724  | 0.409  | 0.620  | 2.384  | 3.442  | 2.268  | 4.615 | 2.206 | 0.005 | 2.272 |
| BIK       | 1.120  | 0.993  | 0.827  | 4.646  | 4.130  | 4.820  | 4.625 | 2.209 | 0.000 | 4.036 |
| TMEM212   | 0.132  | 0.467  | 0.207  | 1.039  | 1.583  | 1.134  | 4.662 | 2.221 | 0.007 | 2.130 |
| HIST1H2BC | 1.976  | 0.759  | 0.552  | 6.603  | 5.025  | 3.757  | 4.681 | 2.227 | 0.013 | 1.902 |
| IGFL2-AS  | 0.066  | 0.117  | 0.207  | 0.917  | 0.344  | 0.567  | 4.694 | 2.231 | 0.049 | 1.308 |
| CD7       | 0.000  | 0.117  | 0.207  | 0.550  | 0.620  | 0.354  | 4.709 | 2.235 | 0.016 | 1.801 |
| C2        | 0.395  | 0.117  | 0.000  | 0.611  | 0.826  | 0.992  | 4.746 | 2.247 | 0.017 | 1.782 |
| SCTR      | 0.329  | 0.175  | 0.000  | 0.672  | 1.170  | 0.567  | 4.776 | 2.256 | 0.038 | 1.416 |
| GRAP      | 0.066  | 0.058  | 0.000  | 0.183  | 0.275  | 0.142  | 4.832 | 2.273 | 0.024 | 1.627 |
| HIST2H2BI | 4.017  | 5.608  | 5.033  | 22.437 | 25.607 | 22.896 | 4.840 | 2.275 | 0.000 | 4.170 |
| PCDHGA7   | 0.198  | 0.234  | 0.000  | 0.550  | 0.551  | 0.992  | 4.854 | 2.279 | 0.028 | 1.553 |

|            |       |       |       |       |       |       |        |       |       |       |
|------------|-------|-------|-------|-------|-------|-------|--------|-------|-------|-------|
| HIST1H2B   | 0.132 | 0.526 | 0.414 | 1.895 | 1.996 | 1.347 | 4.891  | 2.290 | 0.004 | 2.398 |
| SAMMSON    | 0.198 | 0.000 | 0.000 | 0.428 | 0.207 | 0.354 | 5.005  | 2.323 | 0.046 | 1.333 |
| ABHD1      | 0.066 | 0.000 | 0.000 | 0.122 | 0.138 | 0.071 | 5.023  | 2.329 | 0.042 | 1.382 |
| LY6G6C     | 0.066 | 0.000 | 0.000 | 0.122 | 0.069 | 0.142 | 5.054  | 2.338 | 0.045 | 1.345 |
| TINCR      | 0.000 | 0.350 | 0.000 | 0.795 | 0.482 | 0.496 | 5.058  | 2.339 | 0.038 | 1.423 |
| HIST1H3E   | 0.659 | 0.350 | 0.138 | 1.712 | 2.065 | 2.056 | 5.085  | 2.346 | 0.001 | 2.917 |
| AKAP3      | 0.198 | 0.058 | 0.207 | 0.611 | 0.964 | 0.780 | 5.088  | 2.347 | 0.005 | 2.303 |
| RPL5P23    | 0.000 | 0.117 | 0.000 | 0.245 | 0.138 | 0.213 | 5.092  | 2.348 | 0.034 | 1.472 |
| DPY19L1P   | 0.066 | 0.234 | 0.069 | 0.489 | 0.688 | 0.709 | 5.119  | 2.356 | 0.005 | 2.319 |
| SSTR5-AS1  | 0.395 | 0.000 | 0.552 | 1.467 | 1.583 | 1.843 | 5.169  | 2.370 | 0.003 | 2.573 |
| MIR4479    | 0.000 | 0.350 | 0.000 | 0.489 | 0.620 | 0.709 | 5.186  | 2.375 | 0.021 | 1.671 |
| MIRLET7D   | 0.066 | 0.234 | 0.000 | 0.367 | 0.413 | 0.780 | 5.207  | 2.380 | 0.047 | 1.328 |
| DIO30S     | 0.000 | 0.467 | 0.000 | 0.734 | 0.757 | 0.992 | 5.314  | 2.410 | 0.019 | 1.723 |
| COL11A2    | 0.066 | 0.175 | 0.207 | 0.917 | 0.688 | 0.780 | 5.325  | 2.413 | 0.001 | 2.914 |
| ANKRD1     | 0.527 | 0.292 | 0.689 | 2.629 | 2.547 | 2.906 | 5.358  | 2.422 | 0.000 | 3.799 |
| ARHGAP30   | 0.000 | 0.175 | 0.069 | 0.306 | 0.482 | 0.567 | 5.548  | 2.472 | 0.016 | 1.796 |
| NT5DC4     | 0.000 | 0.175 | 0.138 | 0.856 | 0.413 | 0.496 | 5.637  | 2.495 | 0.030 | 1.530 |
| PRRT1B     | 0.000 | 0.526 | 0.000 | 1.100 | 1.101 | 0.780 | 5.671  | 2.504 | 0.016 | 1.787 |
| CNTD1      | 0.198 | 0.058 | 0.138 | 0.978 | 0.482 | 0.780 | 5.686  | 2.508 | 0.015 | 1.831 |
| DLL4       | 0.000 | 0.175 | 0.000 | 0.245 | 0.482 | 0.284 | 5.763  | 2.527 | 0.041 | 1.383 |
| EIF4EP1    | 0.066 | 0.175 | 0.000 | 0.489 | 0.482 | 0.425 | 5.791  | 2.534 | 0.002 | 2.661 |
| DNAAF3     | 0.198 | 0.117 | 0.138 | 1.162 | 0.826 | 0.638 | 5.805  | 2.537 | 0.010 | 2.022 |
| HNRNP1A1P  | 0.000 | 0.000 | 0.069 | 0.122 | 0.138 | 0.142 | 5.827  | 2.543 | 0.009 | 2.023 |
| RPS3P2     | 0.000 | 0.058 | 0.000 | 0.061 | 0.138 | 0.142 | 5.831  | 2.544 | 0.045 | 1.347 |
| TMEM47     | 0.066 | 0.175 | 0.000 | 0.306 | 0.688 | 0.425 | 5.887  | 2.558 | 0.034 | 1.469 |
| KRT18P31   | 0.000 | 0.058 | 0.069 | 0.122 | 0.275 | 0.354 | 5.905  | 2.562 | 0.043 | 1.362 |
| SPTBN5     | 0.066 | 0.175 | 0.207 | 0.978 | 0.826 | 0.851 | 5.927  | 2.567 | 0.000 | 3.495 |
| CYP2A6     | 0.000 | 0.058 | 0.138 | 0.550 | 0.344 | 0.284 | 6.001  | 2.585 | 0.022 | 1.656 |
| C1orf228   | 0.000 | 0.175 | 0.000 | 0.428 | 0.344 | 0.284 | 6.024  | 2.591 | 0.015 | 1.822 |
| LEPR       | 0.263 | 0.350 | 0.138 | 1.528 | 1.308 | 1.701 | 6.035  | 2.593 | 0.001 | 3.207 |
| ZBTB12BP   | 0.066 | 0.000 | 0.000 | 0.122 | 0.138 | 0.142 | 6.099  | 2.609 | 0.008 | 2.102 |
| SHF        | 0.000 | 0.000 | 0.207 | 0.489 | 0.551 | 0.284 | 6.398  | 2.678 | 0.025 | 1.606 |
| AGAP10P    | 0.198 | 0.058 | 0.000 | 0.489 | 0.344 | 0.851 | 6.578  | 2.718 | 0.042 | 1.375 |
| HIST1H3H   | 0.000 | 0.058 | 0.620 | 1.895 | 1.514 | 1.347 | 7.006  | 2.809 | 0.006 | 2.219 |
| CEACAM5    | 0.198 | 0.058 | 0.000 | 0.428 | 0.620 | 0.780 | 7.138  | 2.835 | 0.011 | 1.953 |
| DDR2       | 0.066 | 0.000 | 0.138 | 0.611 | 0.207 | 0.638 | 7.145  | 2.837 | 0.045 | 1.345 |
| IL34       | 0.263 | 0.000 | 0.000 | 0.856 | 0.551 | 0.496 | 7.223  | 2.853 | 0.018 | 1.734 |
| MROH2A     | 0.000 | 0.117 | 0.000 | 0.245 | 0.275 | 0.354 | 7.484  | 2.904 | 0.008 | 2.114 |
| RAB40A     | 0.132 | 0.058 | 0.000 | 0.550 | 0.620 | 0.284 | 7.643  | 2.934 | 0.018 | 1.739 |
| HIST1H2BI  | 0.593 | 0.409 | 0.000 | 2.323 | 2.409 | 3.048 | 7.768  | 2.958 | 0.001 | 2.846 |
| ZNF568     | 0.329 | 0.000 | 0.000 | 0.428 | 1.033 | 1.134 | 7.879  | 2.978 | 0.037 | 1.427 |
| SYT15      | 0.000 | 0.117 | 0.000 | 0.306 | 0.413 | 0.213 | 7.972  | 2.995 | 0.018 | 1.753 |
| TESK2      | 0.329 | 0.234 | 0.414 | 2.935 | 2.822 | 2.056 | 7.999  | 3.000 | 0.001 | 2.900 |
| RANBP3L    | 0.000 | 0.058 | 0.000 | 0.122 | 0.138 | 0.213 | 8.091  | 3.016 | 0.015 | 1.813 |
| HIST1H4E   | 0.000 | 0.292 | 0.000 | 0.978 | 0.895 | 0.496 | 8.112  | 3.020 | 0.018 | 1.754 |
| ACRBP      | 0.000 | 0.058 | 0.138 | 0.367 | 0.620 | 0.638 | 8.275  | 3.049 | 0.008 | 2.110 |
| PSD        | 0.000 | 0.117 | 0.000 | 0.306 | 0.344 | 0.354 | 8.596  | 3.104 | 0.002 | 2.682 |
| PRR34      | 0.000 | 0.117 | 0.000 | 0.306 | 0.275 | 0.425 | 8.614  | 3.107 | 0.008 | 2.105 |
| TMEM191B   | 0.066 | 0.117 | 0.000 | 0.672 | 0.275 | 0.638 | 8.680  | 3.118 | 0.024 | 1.627 |
| DDX18P1    | 0.066 | 0.000 | 0.000 | 0.306 | 0.138 | 0.142 | 8.884  | 3.151 | 0.044 | 1.359 |
| GDF9       | 0.066 | 0.000 | 0.000 | 0.306 | 0.138 | 0.142 | 8.884  | 3.151 | 0.044 | 1.359 |
| BMS1P7     | 0.000 | 0.058 | 0.000 | 0.245 | 0.138 | 0.142 | 8.970  | 3.165 | 0.018 | 1.748 |
| CD226      | 0.000 | 0.000 | 0.138 | 0.550 | 0.413 | 0.284 | 9.042  | 3.177 | 0.015 | 1.836 |
| CSNK1G2-1  | 0.000 | 0.058 | 0.000 | 0.183 | 0.138 | 0.213 | 9.137  | 3.192 | 0.006 | 2.250 |
| LDLRAD2    | 0.066 | 0.000 | 0.000 | 0.122 | 0.207 | 0.284 | 9.297  | 3.217 | 0.024 | 1.619 |
| LHX2       | 0.066 | 0.000 | 0.000 | 0.122 | 0.207 | 0.284 | 9.297  | 3.217 | 0.024 | 1.619 |
| PRSS27     | 0.066 | 0.058 | 0.000 | 0.672 | 0.275 | 0.284 | 9.909  | 3.309 | 0.050 | 1.303 |
| ACP4       | 0.000 | 0.058 | 0.000 | 0.306 | 0.138 | 0.142 | 10.017 | 3.324 | 0.040 | 1.396 |
| NHLRC4     | 0.066 | 0.000 | 0.000 | 0.122 | 0.207 | 0.354 | 10.374 | 3.375 | 0.045 | 1.349 |
| CHRNA10    | 0.066 | 0.000 | 0.000 | 0.183 | 0.344 | 0.213 | 11.240 | 3.491 | 0.014 | 1.848 |
| TBC1D10C   | 0.066 | 0.000 | 0.000 | 0.183 | 0.275 | 0.284 | 11.271 | 3.495 | 0.004 | 2.357 |
| RPS11P6    | 0.000 | 0.117 | 0.000 | 0.489 | 0.275 | 0.567 | 11.397 | 3.511 | 0.013 | 1.877 |
| TFCP2L1    | 0.000 | 0.058 | 0.000 | 0.122 | 0.344 | 0.213 | 11.626 | 3.539 | 0.037 | 1.430 |
| GJC2       | 0.132 | 0.000 | 0.000 | 0.428 | 0.688 | 0.567 | 12.780 | 3.676 | 0.004 | 2.394 |
| ARHGAP44   | 0.000 | 0.058 | 0.000 | 0.122 | 0.275 | 0.354 | 12.875 | 3.686 | 0.031 | 1.509 |
| SPINT1-AS1 | 0.066 | 0.000 | 0.000 | 0.367 | 0.207 | 0.284 | 13.010 | 3.702 | 0.007 | 2.170 |
| SLC17A7    | 0.066 | 0.000 | 0.000 | 0.245 | 0.275 | 0.354 | 13.275 | 3.731 | 0.002 | 2.621 |
| KCNS1      | 0.066 | 0.000 | 0.000 | 0.122 | 0.413 | 0.354 | 13.509 | 3.756 | 0.040 | 1.400 |
| ADAMTSL2   | 0.132 | 0.117 | 0.069 | 1.467 | 1.996 | 0.851 | 13.588 | 3.764 | 0.016 | 1.799 |
| LBX1       | 0.066 | 0.000 | 0.000 | 0.306 | 0.207 | 0.425 | 14.235 | 3.831 | 0.012 | 1.912 |
| C6orf99    | 0.000 | 0.058 | 0.000 | 0.245 | 0.413 | 0.213 | 14.898 | 3.897 | 0.014 | 1.847 |
| SARM1      | 0.000 | 0.058 | 0.000 | 0.306 | 0.207 | 0.425 | 16.049 | 4.004 | 0.011 | 1.941 |
| ABHD17AP1  | 0.000 | 0.058 | 0.000 | 0.245 | 0.275 | 0.496 | 17.395 | 4.121 | 0.017 | 1.760 |
| RFTN2      | 0.066 | 0.000 | 0.000 | 0.306 | 0.482 | 0.425 | 18.415 | 4.203 | 0.002 | 2.608 |
| CLEC18B    | 0.000 | 0.058 | 0.000 | 0.367 | 0.275 | 0.496 | 19.488 | 4.285 | 0.006 | 2.238 |
| SLC31A2    | 0.066 | 0.000 | 0.000 | 0.367 | 0.688 | 0.354 | 21.403 | 4.420 | 0.016 | 1.799 |
| MIR4470    | 0.000 | 0.058 | 0.000 | 0.428 | 1.170 | 0.709 | 39.495 | 5.304 | 0.026 | 1.584 |
